# Supplementary material
Source: MDPI journal article supplement (https://www.mdpi.com/2076-3298/10/10/178)
Supplement: s1 [file s1 › environments-2605067-supplementary.pdf]

**Supporting Information for**

**Red Claw Crayfish *Cherax quadricarinatus* Cultivation Influences the Dynamics**

**and Assembly of Benthic Bacterial Communities in Paddy Fields**

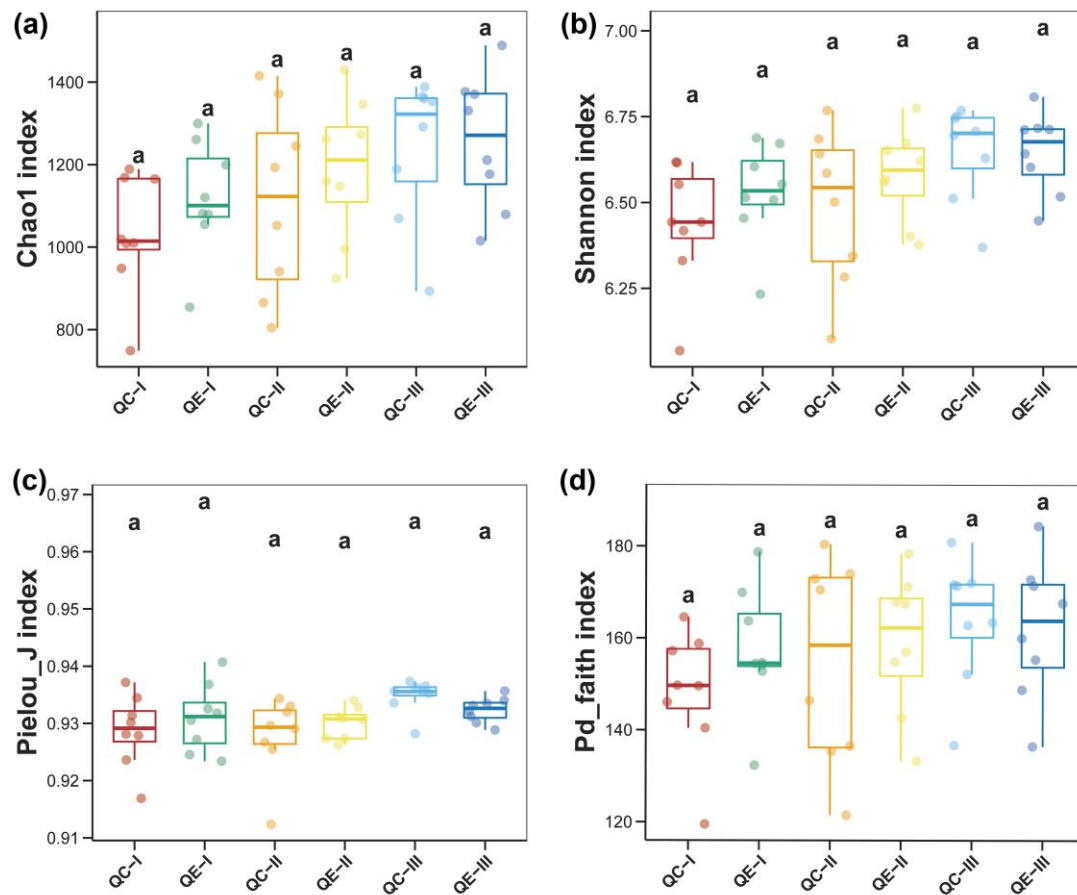

**Figure S1.** Differences in alpha diversity indices of bacterial communities in paddy soil with and without red claw crayfish *Cherax quadricarinatus* cultivation during the experimental period. Different lowercase letters above each box in the same sub-figure represent significant differences between groups (Tukey's HSD test,  $P < 0.05$ ). QE and QC indicate the red claw crayfish cultivation group and the control group, respectively. I, II, and III represent three culture stages, which are the 25th August, 25th September, and 25th October, respectively.

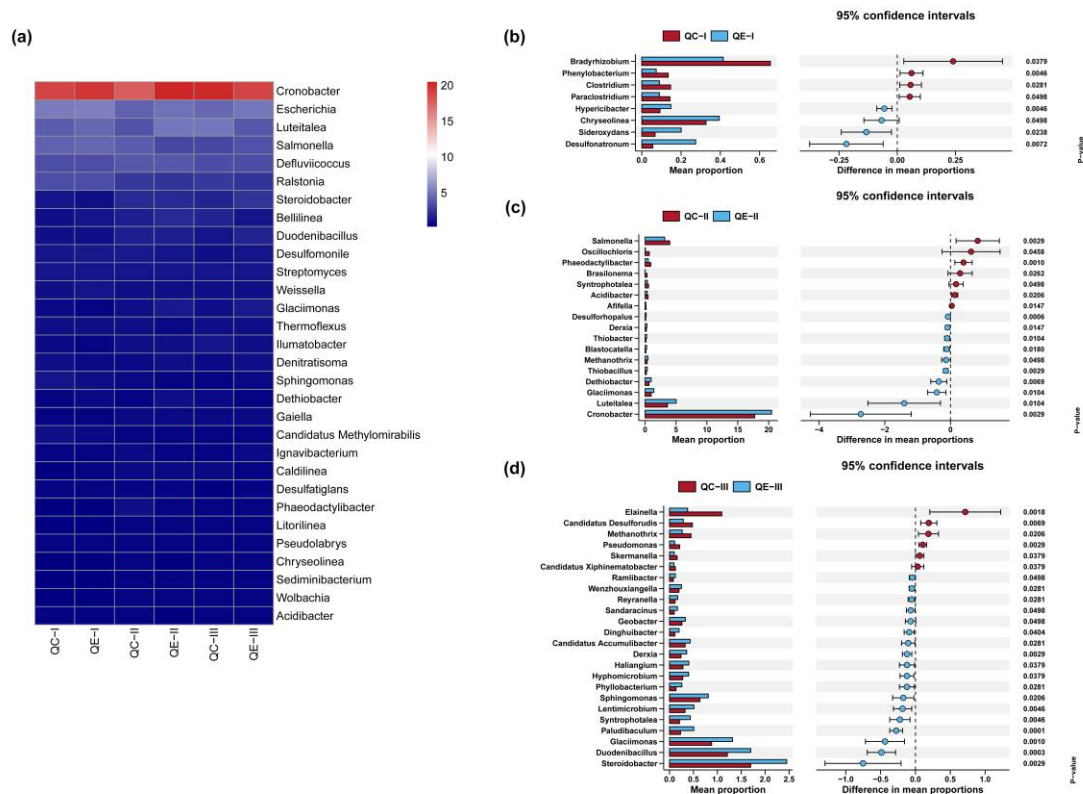

**Figure S2.** Compositions of bacterial communities at the genus level in the paddy soil.

(a) Relative abundances of the dominate genera (most abundant top 30) in paddy soil during the experimental period. (b) Significantly different genera in paddy soil between QC and QE groups at the culture stage I. (c) Significantly different genera in paddy soil between QC and QE groups at the culture stage II. (d) Significantly different genera in paddy soil between QC and QE groups at the culture stage III. QE and QC indicate the red claw crayfish cultivation group and the control group, respectively. I, II, and III represent three culture stages, which are the 25th August, 25th September, and 25th October, respectively.

**Table S1.** Two-way PERMANOVA of culture stages and red claw crayfish *Cherax quadricarinatus* cultivation for bacterial community in paddy fields based on the Bray–Curtis distance.

|                                      | <b>F</b> | <b>R<sup>2</sup></b> | <b>p-value</b> |
|--------------------------------------|----------|----------------------|----------------|
| <b>Culture stage</b>                 | 3.0328   | 0.1165               | 0.001          |
| <b>Red claw crayfish cultivation</b> | 1.2332   | 0.0237               | 0.057          |
| <b>Two-factor interaction</b>        | 1.3835   | 0.0532               | 0.003          |

**Table S2.** Topological parameters of co-occurrence networks constructed by bacteria in paddy soil. QE and QC indicate the red claw crayfish cultivation group and the control group, respectively. I, II, and III represent three culture stages, which are the 25th August, 25th September, and 25th October, respectively.

| Topological parameters     | QC-I   | QE-I   | QC-II  | QE-II  | QC-III | QE-III |
|----------------------------|--------|--------|--------|--------|--------|--------|
| <b>Node number</b>         | 145    | 151    | 170    | 188    | 192    | 190    |
| <b>Edge number</b>         | 488    | 293    | 432    | 499    | 577    | 607    |
| <b>Positive edge ratio</b> | 55.53% | 53.92% | 65.51% | 56.71% | 58.06% | 59.14% |
| <b>Negative edge ratio</b> | 44.67% | 46.08% | 34.49% | 43.29% | 41.94% | 40.86% |
| <b>Degree</b>              | 6.37   | 3.88   | 5.08   | 4.31   | 6.01   | 6.39   |
| <b>Diameter</b>            | 11     | 14     | 11     | 11     | 10     | 11     |
| <b>Density</b>             | 0.047  | 0.026  | 0.03   | 0.028  | 0.031  | 0.034  |
| <b>Modularity</b>          | 0.607  | 0.712  | 0.694  | 0.653  | 0.638  | 0.062  |

**Table S3.** Significance tests of environmental factors in Redundancy analysis (RDA).

|                | <b>R<sup>2</sup></b> | <b>p-value</b> |
|----------------|----------------------|----------------|
| <b>TP</b>      | 0.048                | 0.511          |
| <b>TN</b>      | 0.787                | 0.001          |
| <b>Ammonia</b> | 0.284                | 0.010          |
| <b>Nitrite</b> | 0.252                | 0.030          |
| <b>Nitrate</b> | 0.592                | 0.001          |
